# Supplementary material for: Influence of Population Size, the Human Development Index and the Gross Domestic Product on Mortality by COVID-19 in the Southeast Region of Brazil
Source: Int J Environ Res Public Health. 2022 Nov 4;19(21):14459. doi: 10.3390/ijerph192114459 (PMC9658565; doi:10.3390/ijerph192114459)
Supplement: Supplementary file 1 [file ijerph-19-14459-s001.zip › ijerph-1896175-supplementary-Table S1.pdf]

Table S1. Absolute proportion of municipalities of the four states of the Brazilian Southeast region, according to population size (POP); gross domestic product (GDP); and Municipal Human Development Index (HDI-M), over the course of 62 weeks of the pandemic.

|                                        |                               | Proportion of municipalities of the Brazilian Southeast region |                         |                          |                      |                   |
|----------------------------------------|-------------------------------|----------------------------------------------------------------|-------------------------|--------------------------|----------------------|-------------------|
|                                        |                               | Espírito Santo<br>(n=78)                                       | Minas Gerais<br>(n=853) | Rio de Janeiro<br>(n=92) | São Paulo<br>(n=645) | Total<br>(n=1668) |
| Total of inhabitants                   |                               | 4.018.650                                                      | 21.168.791              | 17.264.943               | 45.919.049           | 88.371.433        |
| Population                             | Small                         | 66 (84.6%)                                                     | 782 (91.7%)             | 54 (58.7%)               | 506 (78.5%)          | 1408 (84.4%)      |
|                                        | Medium                        | 2 (2.56%)                                                      | 38 (4.5%)               | 8 (8.7%)                 | 58 (9.0%)            | 106 (6.4%)        |
|                                        | Big                           | 9 (11.54%)                                                     | 29 (3.4%)               | 23 (25.0%)               | 72 (11.2%)           | 133 (8.0%)        |
|                                        | Metropolis<br>0,5 - 1 million | 1 (1.28%)                                                      | 3 (0.35%)               | 5 (5.43%)                | 6 (0.93%)            | 15 (0.9%)         |
|                                        | Metropolis<br>1 - 2 million   | -                                                              | -                       | 1 (1.09%)                | 2 (0.31%)            | 3 (0.18%)         |
|                                        | Metropolis<br>> 2 million     | -                                                              | 1 (0.12%)               | 1 (1.09%)                | 1 (0.16%)            | 3 (0.18%)         |
|                                        |                               |                                                                |                         |                          |                      |                   |
| Number of<br>Inhabitants<br>(×100.000) | Small                         | 12.7 (31.6%)                                                   | 86.6 (40.9%)            | 12.3 (7.1%)              | 70 (15.2%)           | 181.7<br>(20.6%)  |
|                                        | Medium                        | 1.3 (3.2%)                                                     | 27.5 (13%)              | 5.6 (3.2%)               | 40.2 (8.8%)          | 74.6 (8.4%)       |
|                                        | Big                           | 21 (52.3%)                                                     | 53.2 (25.1%)            | 43.9 (25.4%)             | 157.1 (34.2%)        | 275.2<br>(31.1%)  |
|                                        | Metropolis<br>0,5 - 1 million | 5.2 (12.9%)                                                    | 19.2 (9.1%)             | 32.7 (18.9%)             | 43.6 (9.5%)          | 100.8<br>(11.4%)  |
|                                        | Metropolis<br>1 - 2 million   | -                                                              | -                       | 10.8 (6.3%)              | 25.8 (5.6%)          | 36.7 (4.2%)       |
|                                        | Metropolis<br>> 2 million     | -                                                              | 25.1 (11.9%)            | 67.2 (38.9%)             | 122.5 (26.7%)        | 214.8<br>(24.3%)  |
|                                        |                               |                                                                |                         |                          |                      |                   |
| GDP                                    | Very low                      | -                                                              | 176 (20.6%)             | -                        | 6 (0.93%)            | 182 (10.91%)      |
|                                        | Low                           | 67 (85.9%)                                                     | 563 (66%)               | 61 (66.3%)               | 396 (61.4%)          | 1087 (65.2%)      |
|                                        | Middle                        | 7 (8.97%)                                                      | 90 (10.6%)              | 17 (18.5%)               | 194 (30.1%)          | 308 (18.5%)       |
|                                        | High                          | 2 (2.56%)                                                      | 15 (1.76%)              | 9 (9.78%)                | 31 (4.81%)           | 57 (3.42%)        |
|                                        | Very high                     | 2 (2.56%)                                                      | 9 (1.06%)               | 5 (5.43%)                | 18 (2.79%)           | 34 (2.04%)        |
| Number of<br>inhabitants/GDP           | Very low                      | -                                                              | 16.9 (8%)               | -                        | 2.3 (0.5%)           | 19.2 (2.2%)       |
|                                        | Low                           | 26.1 (64.9%)                                                   | 108.8 (51.4%)           | 60.3 (34.9%)             | 99.8 (21.7%)         | 295.1<br>(33.4%)  |
|                                        | Middle                        | 9.6 (23.9%)                                                    | 80.7 (38.1%)            | 92.7 (53.7%)             | 312.2 (68%)          | 495.2 (56%)       |
|                                        | High                          | 4 (10%)                                                        | 3.1 (1.5%)              | 16.9 (9.8%)              | 23.9 (5.2%)          | 47.9 (5.4%)       |
|                                        | Very high                     | 0.46 (1.1%)                                                    | 2.2 (1%)                | 2.7 (1.6%)               | 21 (4.6%)            | 26.4 (3%)         |
| IDH-M                                  | Low                           | -                                                              | 73 (8.56%)              | -                        | -                    | 73 (4.38%)        |
|                                        | Medium                        | 46 (58.97%)                                                    | 548 (64.24%)            | 35 (38.04%)              | 66 (10.23%)          | 695 (41.67%)      |
|                                        | High                          | 30 (38.46%)                                                    | 230 (26.96%)            | 55 (59.78%)              | 556 (86.2%)          | 871 (52.22%)      |
|                                        | Very high                     | 2 (2.56%)                                                      | 2 (0.23%)               | 2 (2.17%)                | 23 (3.57%)           | 29 (1.74%)        |
| Number of<br>inhabitants/IDH-M         | Low                           | -                                                              | 6.3 (3%)                | -                        | -                    | 6.3 (0.7%)        |
|                                        | Medium                        | 9.1 (22.6%)                                                    | 60 (28.3%)              | 18 (10.4%)               | 8.4 (1.8%)           | 95.5 (10.8%)      |
|                                        | High                          | 22.5 (56%)                                                     | 119.4 (56.4%)           | 149.4 (86.5%)            | 252.7 (55%)          | 544 (61.6%)       |
|                                        | Very high                     | 8.6 (21.4%)                                                    | 26.1 (12.3%)            | 5.3 (3.1%)               | 198.1 (43.1%)        | 238 (26.9%)       |

Legend: POP classification: Small cities (under 50,000 inhabitants); medium cities (50,000 to 100,000 inhabitants); big cities (100,000 to 500,000 inhabitants); and metropolises (over 500,000 inhabitants). GDP classification: Very low GDP (lower than BRL10,000); low GDP (BRL10,001 to BRL30,000); middle GDP (BRL30,001 to 60,000); high GDP (BRL60,001 to 100,000); and very-high GDP (higher than BRL100,000). HDI-M classification: very low HDI-M (0 to 0.499); low HDI-M (0.500 to 0.599); medium HDI-M (0.600 to 0.699); high HDI-M (0.700 to 0.799); and very high HDI-M (0.800 to 1.0).
